1 **Title:** Outer membrane lipid homeostasis via retrograde phospholipid transport in *Escherichia*  
2 *coli*

3

4 **Authors:** Rahul Shrivastava<sup>a</sup>, Xiang'Er Jiang<sup>b</sup>, Shu-Sin Chng<sup>a,b\*</sup>

5

6 **Affiliations:**

7 <sup>a</sup>Department of Chemistry, National University of Singapore, Singapore 117543.

8 <sup>b</sup>Singapore Center for Environmental Life Sciences Engineering, National University of  
9 Singapore (SCELSE-NUS), Singapore 117456.

10

11 \*To whom correspondence should be addressed. E-mail: [chmchngs@nus.edu.sg](mailto:chmchngs@nus.edu.sg)

12

13

14 **Summary**

15

16 Biogenesis of the outer membrane (OM) in Gram-negative bacteria, which is essential for  
17 viability, requires the coordinated transport and assembly of proteins and lipids, including  
18 lipopolysaccharides (LPS) and phospholipids (PLs), into the membrane. While pathways for LPS  
19 and OM protein assembly are well-studied, how PLs are transported to and from the OM is not  
20 clear. Mechanisms that ensure OM stability and homeostasis are also unknown. The trans-  
21 envelope Tol-Pal complex, whose physiological role has remained elusive, is important for OM  
22 stability. Here, we establish that the Tol-Pal complex is required for PL transport and OM lipid  
23 homeostasis in *Escherichia coli*. Cells lacking the complex exhibit defects in lipid asymmetry  
24 and accumulate excess phospholipids (PLs) in the OM. This imbalance in OM lipids is due to  
25 defective retrograde PL transport in the absence of a functional Tol-Pal complex. Thus, cells  
26 ensure the assembly of a stable OM by maintaining an excess flux of PLs to the OM only to  
27 return the surplus to the inner membrane. Our findings also provide insights into the mechanism  
28 by which the Tol-Pal complex may promote OM invagination during cell division.

29

30 **Running title**

31 A physiological function for the Tol-Pal complex

32

33 **Keywords**

34 outer membrane stability; membrane homeostasis; lipid trafficking; membrane lipid asymmetry;  
35 membrane contact sites; TolQRA

36

37 **Introduction**

38

39 Lipid bilayers define cellular compartments, and thus life itself, yet our understanding of  
40 the assembly and maintenance of these structures are limited. In Gram-negative bacteria, the  
41 outer membrane (OM) is essential for growth, and allows the formation of an oxidizing  
42 periplasmic compartment beyond the cytoplasmic or inner membrane (IM) (Nikaido, 2003). The  
43 OM is asymmetric, with lipopolysaccharides (LPS) and phospholipids (PLs) found in the outer  
44 and inner leaflets, respectively. This unique lipid asymmetry is required for the OM to function  
45 as an effective and selective permeability barrier against toxic substances, rendering Gram-  
46 negative bacteria intrinsically resistant to many antibiotics, and allowing survival under adverse  
47 conditions. The assembly pathways of various OM components, including LPS (Okuda *et al.*,  
48 2016),  $\beta$ -barrel OM proteins (OMPs) (Hagan *et al.*, 2011), and lipoproteins (Okuda and Tokuda,  
49 2011), have been well-characterized; however, processes by which PLs are assembled into the  
50 OM have not been discovered. Even though they are the most basic building blocks of any lipid  
51 bilayer, little is known about how PLs are transported between the IM and the OM. Unlike other  
52 OM components, PL movement between the two membranes is bidirectional (Donohue-Rolfe  
53 and Schaechter, 1980; Jones and Osborn, 1977; Langley *et al.*, 1982). While anterograde (IM-to-  
54 OM) transport is essential for OM biogenesis, the role for retrograde (OM-to-IM) PL transport is  
55 unclear. How assembly of the various OM components are coordinated to ensure homeostasis  
56 and stability of the OM is also unknown.

57 The Tol-Pal complex is a trans-envelope system highly conserved in Gram-negative  
58 bacteria (Lloubes *et al.*, 2001; Sturgis, 2001). It comprises five proteins organized in two sub-  
59 complexes, TolQRA in the IM and TolB-Pal at the OM. In *Escherichia coli*, these sub-  
60 complexes interact in a proton motive force (pmf)-dependent fashion, with TolQR transducing

61 energy to control conformational changes in TolA and allowing it to reach across the periplasm  
62 to contact Pal (Cascales *et al.*, 2000; Germon *et al.*, 2001), an OM lipoprotein that binds  
63 peptidoglycan (Godlewska *et al.*, 2009). TolA also interacts with periplasmic TolB (Walburger  
64 *et al.*, 2002), whose function within the complex is not clear. The TolQRA sub-complex is  
65 analogous to the ExbBD-TonB system (Lloubes *et al.*, 2001; Cascales *et al.*, 2001; Witty *et al.*,  
66 2002), where energy-dependent conformational changes in TonB are exploited for the transport  
67 of metal-siderophores across the OM (Gresock *et al.*, 2015). Unlike the ExbBD-TonB system,  
68 however, the physiological role of the Tol-Pal complex has not been elucidated, despite being  
69 discovered over four decades ago (Bernstein *et al.*, 1972; Lazzaroni and Portalier, 1981). The  
70 Tol-Pal complex has been shown to be important for OM invagination during cell division  
71 (Gerding *et al.*, 2007), but mutations in the *tol-pal* genes also result in a variety of phenotypes,  
72 such as hypersensitivity to detergents and antibiotics, leakage of periplasmic proteins, and  
73 prolific shedding of OM vesicles, all indicative of an unstable OM (Lloubes *et al.*, 2001). In  
74 addition, removing the *tol-pal* genes causes envelope stress and up-regulation of the  $\sigma^E$  and Rcs  
75 phosphorelay responses (Vines *et al.*, 2005; Clavel *et al.*, 1996). It has thus been suggested that  
76 the Tol-Pal complex may in fact be important for OM stability and biogenesis. Interestingly, the  
77 *tol-pal* genes are often found in the same operon as *ybgC* (Sturgis, 2001), which encodes an acyl  
78 thioesterase shown to interact with PL biosynthetic enzymes in *E. coli* (Gully and Bouveret,  
79 2006). This association suggests that the Tol-Pal complex may play a role in PL metabolism  
80 and/or transport.

81 Here, we report that the Tol-Pal complex is required for retrograde PL transport and OM  
82 lipid homeostasis in *E. coli*. We show that cells lacking the Tol-Pal complex exhibit defects in  
83 OM lipid asymmetry, as judged by the presence of outer leaflet PLs. We further demonstrate that  
84 *tol-pal* mutants accumulate excess PLs (relative to LPS) in the OM, indicating lipid imbalance in

85 the membrane. Finally, using OM PL turnover as readout, we establish that the Tol-Pal complex  
86 is functionally important for efficient transport of PLs from the OM back to the IM. Our work  
87 solves a longstanding question on the physiological role of the Tol-Pal complex, and provides  
88 novel mechanistic insights into lipid homeostasis in the OM.

89

## 90 **Results**

91

### 92 **Cells lacking the Tol-Pal complex exhibit defects in OM lipid asymmetry**

93 To elucidate the function of the Tol-Pal complex, we set out to characterize the molecular  
94 nature of OM defects observed in *tol-pal* mutants in *E. coli*. Defects in the assembly of OM  
95 components typically lead to perturbations in OM lipid asymmetry (Wu *et al.*, 2006; Ruiz *et al.*,  
96 2008). This is characterized by the accumulation of PLs in the outer leaflet of the OM, which  
97 serve as substrates for PagP-mediated acylation of LPS (lipid A) (Bishop, 2005). To determine if  
98 *tol-pal* mutants exhibit defects in OM lipid asymmetry, we analyzed lipid A acylation in strains  
99 lacking any member of the Tol-Pal complex. We demonstrated that each of the mutants  
100 accumulate more hepta-acylated lipid A in the OM compared to wild-type (WT) cells (Fig. 1).  
101 This OM defect, and the resulting SDS/EDTA sensitivity in these *tol-pal* mutants, are all  
102 corrected in the complemented strains (Fig. S1). We also examined other strains with known OM  
103 permeability defects. We detected increased lipid A acylation in strains with either impaired  
104 OMP (*bamB*, *bamD*,  $\Delta$ *surA*) or LPS (*lptD4213*) biogenesis, as would be expected, but not in  
105 strains lacking covalent tethering between the cell wall and the OM ( $\Delta$ *lpp*) (Fig. 1). Even though  
106 the  $\Delta$ *lpp* mutant is known to exhibit pleiotropic phenotypes (Yem and Wu, 1978; Bernadac *et al.*,  
107 1998), it does not have perturbations in OM lipid asymmetry. In contrast to OMP or LPS  
108 assembly mutants, *tol-pal* strains produce WT levels of major OMPs and LPS in the OM (Fig.

109 S2). These results indicate that *tol-pal* mutations lead to accumulation of PLs in the outer leaflet  
110 of the OM independent of OMP and LPS biogenesis pathways.

111

### 112 **Cells lacking the Tol-Pal complex have disrupted OM lipid homeostasis**

113 We hypothesized that the loss of OM lipid asymmetry in *tol-pal* mutants is due to defects  
114 in PL transport across the cell envelope. To test this, we examined the steady-state distribution of  
115 PLs (specifically labelled with [<sup>3</sup>H]-glycerol) between the IM and the OM in WT and *tol-pal*  
116 strains. We established that *tol-pal* mutants have ~1.4-1.6-fold more PLs in their OMs (relative  
117 to the IMs) than the WT strain (Fig. 2A and Fig. S4). To ascertain if this altered distribution of  
118 PLs between the two membranes was due to the accumulation of more PLs in the OMs of *tol-pal*  
119 mutants, we quantified the ratios of PLs to LPS (both lipids now labelled with [<sup>14</sup>C]-acetate)  
120 following OM isolation and differential extraction. *tol-pal* mutants contain ~1.5-2.5-fold more  
121 PLs (relative to LPS) in their OMs, when compared to the WT strain (Fig. 2B and Fig. S5). Since  
122 *tol-pal* mutants produce WT LPS levels (Fig. S2), we conclude that strains lacking the Tol-Pal  
123 complex accumulate excess PLs in their OMs, a phenotype that can be corrected via genetic  
124 complementation (Fig. 2). Consistent with this idea, *tol-pal* mutants, unlike WT (Fuhrer *et al.*,  
125 2006), are able to survive the toxic effects of LPS overproduction (Fig. S6), possibly due to a  
126 more optimal balance of PLs to LPS in their OMs. Importantly, having excess PLs makes the  
127 OM unstable, which can account for lipid asymmetry defects (Fig. 1), and increased permeability  
128 of the OM in *tol-pal* mutants (Lloubes *et al.*, 2001). It also explains why these strains produce  
129 more OM vesicles (~34-fold higher than WT cells, albeit only at ~5% of total membranes (Fig.  
130 S7A)) (Bernadac *et al.*, 1998). Consistent with this idea, OM vesicles isolated from the  $\Delta tolA$   
131 mutant similarly contain an elevated ratio of PLs to LPS, when compared to that in the WT OM  
132 (Fig. S7B). Furthermore, cells lacking the Tol-Pal complex are on average shorter and wider than

133 WT cells (when grown under conditions with no apparent division defects) (Gerding *et al.*,  
134 2007); this reflects an increase in surface area of the rod-shaped cells, perhaps a result of  
135 increase in OM lipid content. As expected, we did not observe disruption of lipid homeostasis in  
136 the  $\Delta lpp$  mutant (Fig. 2). However, we observed higher PL content in the OMs of strains  
137 defective in OMP assembly. We reasoned that this increase may help to stabilize the OM by  
138 filling the voids created by the decrease in properly-assembled OMPs. Since strains lacking the  
139 Tol-Pal complex have proper OMP assembly (Fig. 2A), the phenotype of excess PL build-up in  
140 the OM must be due to a different problem. Our results suggest that *tol-pal* mutations directly  
141 affect PL transport processes, and therefore OM lipid homeostasis.

142

### 143 **Cells lacking the Tol-Pal complex are defective in retrograde PL transport**

144 Unlike for other OM components, PL transport between the IM and the OM is  
145 bidirectional (Donohue-Rolfe and Schaechter, 1980; Jones and Osborn, 1977; Langley *et al.*,  
146 1982). Therefore, a simple explanation for the accumulation of excess PLs in the OMs of cells  
147 lacking the Tol-Pal complex is that there are defects in retrograde PL transport. To evaluate this  
148 possibility, we used the turnover of OM PLs (specifically anionic lipids, including  
149 phosphatidylserine (PS), phosphatidylglycerol (PG), and cardiolipin (CL)) as readout for the  
150 transport of PLs back to the IM (Fig. 3A). As an intermediate during the biosynthesis of the  
151 major lipid phosphatidylethanolamine (PE), PS is converted to PE by the PS decarboxylase  
152 (PSD) at the IM, and typically exists only at trace levels (Cronan, 2003). PG and CL have  
153 relatively short lifetimes (Kanfer and Kennedy, 1963; Kanemasa *et al.*, 1967). While CL  
154 turnover is not well understood, PG turnover can occur via multiple pathways in *E. coli*  
155 (Hirschberg and Kennedy, 1972; Schulman and Kennedy, 1977; Yokoto and Kito, 1982). One  
156 specific way PG can turn over is by conversion to PE via PS, particularly when it is accumulated

157 to abnormal levels in cells (Yokoto and Kito, 1982). Since all enzymatic activities possibly  
158 involved in converting PG to PS, and then to PE, are localized in the IM (Cronan, 2003), the  
159 turnover of OM anionic lipids via this pathway require, and therefore report on, retrograde PL  
160 transport (Fig. 3A). Such an assay has previously been employed to demonstrate retrograde  
161 transport for PS (Langley *et al.*, 1982).

162 Using a strain expressing a temperature-sensitive (Ts) allele (*psd2*) of the gene encoding  
163 PSD (Hawrot and Kennedy, 1978), we pulse-labelled PLs with [<sup>32</sup>P]-phosphate at the restrictive  
164 temperature (42°C), and monitored the turnover of individual PL species in the OM during a  
165 chase period at the permissive temperature (30°C). At 42°C, the *psd2* strain accumulates  
166 substantial amounts of PS in both the IM and the OM (Fig. 3B, 0-min time point), as previously  
167 reported (Hawrot and Kennedy, 1978). With the restoration of PSD activity at 30°C, we observed  
168 initial increase but eventual conversion of PS to PE in both membranes (Fig. 3B, after 45-min  
169 time point), indicating that OM PS is transported back to the IM, converted to PE, and  
170 subsequently re-equilibrated to the OM (Langley *et al.*, 1982). We also detected abnormally high  
171 PG/CL content in the *psd2* strain at 42°C, and saw rapid conversion of these lipids to PE in both  
172 membranes at 30°C (Fig. 3B), at rates comparable to what was previously reported (for PG)  
173 (Yokoto and Kito, 1982). The fact that PS levels increase initially but decrease after 45 min into  
174 the chase is consistent with the idea that PS is an intermediate along the turnover pathway for PG  
175 (Yokoto and Kito, 1982), as well as for CL. To confirm this observation, we also performed the  
176 chase at 42°C in the presence of a known PSD inhibitor (Satre and Kennedy, 1978) (these  
177 conditions completely shut down PSD activity), and found quantitative conversion of PG/CL to  
178 PS in both membranes (Fig. S8). We further showed that PG/CL-to-PE conversion is abolished  
179 in the presence of the pmf uncoupler carbonyl cyanide *m*-chlorophenyl hydrazone (CCCP) (Fig.  
180 3C), demonstrating that cellular energy sources are required for this process (Yokoto and Kito,



181 1982), and that conversion occurs in the IM. The observation of PG/CL turnover in the IM is  
182 thus expected. The fact that we also observed the conversion of OM PG/CL to PE points towards  
183 an intact retrograde PL transport pathway for these lipids in the otherwise WT cells. Notably,  
184 turnover of OM PG/CL appears to be slightly faster than that of IM PG/CL (Fig. 3B), suggesting  
185 that retrograde transport of these lipids may be coupled to the turnover process.

186 We performed the same pulse-chase experiments with *psd2* cells lacking TolA. We  
187 detected PG/CL-to-PE conversion in the IM at rates comparable to WT (Fig. 3D, F; ~67% and  
188 ~71% PG/CL turnover at 2 h-chase in  $\Delta tolA$  and WT IMs, respectively (Fig. 4A)), demonstrating  
189 that there are functional PG/CL turnover pathways in the  $\Delta tolA$  mutant. In contrast, we observed  
190 substantial reduction of the turnover of OM PG/CL in these cells (Fig. 3D, F; ~53% PG/CL  
191 turnover at 2 h-chase in the  $\Delta tolA$  OM, compared to ~79% for WT (Fig. 4A)), even though PS  
192 conversion to PE appears intact. These results indicate an apparent defect in the movement of PG  
193 and CL (but not PS) from the OM back to the IM, which is restored when complemented with  
194 functional *tolA*<sub>WT</sub> (Fig. 3E, F, and Fig. 4A).  $\Delta tolR$  mutant cells exhibit the same defect, and can  
195 similarly be rescued by complementation with functional *tolR*<sub>WT</sub> (Fig. 4A). In contrast, no rescue  
196 was observed when  $\Delta tolR$  was complemented using a *tolR* allele with impaired ability to utilize  
197 the pmf (*tolR*<sub>D23R</sub>) (Cascales *et al.*, 2001) (Fig. 4A and Fig. S1); this indicates that Tol-Pal  
198 function is required for efficient PG/CL transport. We also examined PG/CL turnover in *psd2*  
199 cells lacking BamB, which accumulate excess PLs in the OM due to defects in OMP assembly  
200 (Fig. 2). Neither IM nor OM PG/CL turnover is affected (Fig. 4A), highlighting the different  
201 basis for OM PL accumulation in this strain compared to the *tol-pal* mutants. Our assay does not  
202 report on the retrograde transport of major lipid PE, which is relatively stable (Kanfer and  
203 Kennedy, 1963). However, since *tol-pal* mutants accumulate ~1.5-fold more PLs in the OM (Fig.  
204 2) without gross changes in PL composition (compared to WT) (Fig. S10), PE transport must

205 also have been affected. We conclude that the Tol-Pal complex is required for the retrograde  
206 transport of bulk PLs in *E. coli*.

207

208 **Overexpressing a putative PL transport system partially rescues defects in retrograde PL**  
209 **transport observed in *tol-pal* mutants**

210 Removing the Tol-Pal complex does not completely abolish retrograde PG/CL transport,  
211 indicating that there are other systems involved in this process. The OmpC-Mla system is  
212 important for the maintenance of OM lipid asymmetry, and is proposed to do so via retrograde  
213 PL transport (Malinverni and Silhavy, 2009; Chong *et al.*, 2015). Two other related systems, the  
214 Pqi and Yeb systems, have recently been suggested to be involved in PL transport (Ekiert *et al.*,  
215 2017); however, cells lacking either/both of these systems do not exhibit obvious OM defects  
216 unless the OmpC-Mla system is also removed (Nakayama and Zhang-Akiyama, 2016). To  
217 determine if the OmpC-Mla system plays a major role in retrograde PL transport in cells lacking  
218 the Tol-Pal complex, we examined OM PG/CL turnover in  $\Delta tolA$  cells also lacking MlaC, the  
219 putative periplasmic lipid chaperone of the system. We first showed that cells lacking MlaC  
220 alone do not exhibit defects in OM PG/CL turnover (Fig. 4A). Evidently, removing MlaC also  
221 does not exacerbate the defects in retrograde PL transport in cells lacking the Tol-Pal complex,  
222 given that overall turnover rates of IM and OM PG/CL are similarly reduced in the double  
223 mutant. These results indicate that the OmpC-Mla system does not contribute significantly to  
224 retrograde transport of bulk lipids when expressed at physiological levels, as has been previously  
225 suggested (Malinverni and Silhavy, 2009). We also tested whether overexpressing the OmpC-  
226 Mla system can restore retrograde PL transport in *tol-pal* mutants. Interestingly, overexpression  
227 of MlaC and the IM MlaFEDB complex (Thong *et al.*, 2016), but not MlaA, partially rescues  
228 OM PG/CL turnover in the  $\Delta tolA$  mutant (Fig. 4B). However, this has no consequential effect on

229 alleviating permeability defects observed in the  $\Delta tolA$  strain (Fig. 4B and Fig. S11), presumably  
230 because the OmpC-Mla system may have higher specificity for PG (Thong *et al.*, 2016). Since  
231 PE is the predominant PL species in the OM (Fig. S10) (Cronan, 2003), overexpressing the  
232 OmpC-Mla system may not effectively reduce the overall build-up of PLs caused by the loss of  
233 Tol-Pal function. Further to validating the putative PL transport function of the OmpC-Mla  
234 system, our observation here lends strong support to the notion that the Tol-Pal complex may be  
235 a major system for retrograde PL transport.

236

## 237 **Discussion**

238

239 Our work reveals that the Tol-Pal complex plays an important role in maintaining OM  
240 lipid homeostasis, possibly via retrograde PL transport. Removing the system causes  
241 accumulation of excess PLs (over LPS) in the OM (Fig. 2). While pathways for anterograde PL  
242 transport remain to be discovered, this result indicates that PL flux to the OM may be  
243 intrinsically higher than that of LPS. Evidently, the ability to transport high levels of PLs to the  
244 OM allows cells to compensate for the loss of OMPs due to defects in assembly (Fig. 2). Our  
245 data suggest that cells maintain an excess flux of PLs to the OM in order to offset changes in the  
246 unidirectional assembly pathways for other OM components, and then return the PL surplus to  
247 the IM via retrograde transport. Having bidirectional PL transport therefore provides a  
248 mechanism to regulate and ensure the formation of a stable OM.

249 It is not clear whether the Tol-Pal complex directly mediates retrograde PL transport. It is  
250 formally possible that the effects we have observed on retrograde PL transport are due to indirect  
251 effects of removing the Tol-Pal complex on other OM processes. However, we have already  
252 shown that removing this complex does not affect the assembly of both OMPs and LPS, two

253 major components in the OM (Fig. S2). Consistently, we have demonstrated that strains with  
254 impaired OMP assembly do not have defects in retrograde PL transport (Fig. 4A). We have also  
255 examined our strains under conditions where *tol-pal* mutants do not exhibit apparent division  
256 defects (Gerding *et al.*, 2007); it is thus unlikely that there could be indirect effects on retrograde  
257 PL transport arising from the role of the Tol-Pal complex during cell division. Therefore, we  
258 believe that the Tol-Pal complex may directly mediate PL transport. One possibility is that this  
259 machine directly binds and transports lipids, even though there are no obvious lipid binding  
260 motifs or cavities found in available structures of the periplasmic components (Deprez C *et al.*,  
261 2005; Carr *et al.*, 2000). The Tol-Pal complex is related to the ExbBD-TonB (Cascales *et al.*,  
262 2001; Celia *et al.*, 2016), Agl-Glt (Faure *et al.*, 2016), and Mot (Cascales *et al.*, 2001; Thormann  
263 and Paulick, 2010) systems, each of which uses pmf-energized conformational changes to  
264 generate force for the uptake of metal-siderophores, for gliding motility, or to power flagella  
265 rotation, respectively. In addition, both the Tol-Pal and ExbBD-TonB complexes are hijacked by  
266 toxins (such as colicins) and bacteriophages to penetrate the OM (Cascales *et al.*, 2007). It is  
267 therefore also possible that the Tol-Pal complex acts simply as a force generator to transport  
268 other PL-binding proteins across the periplasm, or perhaps bring the OM close enough to the IM  
269 for PL transfer to occur via hemifusion events. For the latter scenario, one can envision  
270 energized Tola pulling the OM inwards via its interaction with Pal, which is anchored to the  
271 inner leaflet of the OM (Godlewska *et al.*, 2009). While it remains controversial, the formation  
272 of such “zones of adhesion”, or membrane contact sites, has previously been proposed (Bayer,  
273 1991), and in fact, was suggested to be a mechanism for retrograde transport of native and  
274 foreign lipids (Jones and Osborn, 1977).

275 That the Tol-Pal complex is involved in retrograde PL transport also has significant  
276 implications for Gram-negative bacterial cell division. As part of the divisome, this system is

277 important for proper OM invagination during septum constriction (Gerding *et al.*, 2007; Yeh *et*  
278 *al.*, 2010; Jacquier *et al.*, 2015). How OM invagination occurs is unclear. Apart from physically  
279 tethering the IM and the OM, we propose that removal of PLs from the inner leaflet of the OM,  
280 possibly by the Tol-Pal complex, serves to locally reduce the surface area of the inner leaflet  
281 relative to the outer leaflet (McMahon and Gallop, 2005). According to the bilayer-couple model  
282 (Sheetz and Singer, 1974), this may then induce the requisite negative curvature in the OM at the  
283 constriction site, thus promoting formation of the new cell poles.

284         Given the importance of the Tol-Pal complex in OM stability and bacterial cell division,  
285 it would be an attractive target for small molecule inhibition. This is especially so in some  
286 organisms, including the opportunistic human pathogen *Pseudomonas aeruginosa*, where the  
287 complex is essential for growth (Dennis *et al.*, 1996; Lo Sciuto *et al.*, 2014). The lack of  
288 understanding of the true function of the Tol-Pal complex, however, has impeded progress. We  
289 believe that our work in elucidating a physiological role of this complex will accelerate efforts in  
290 this direction, and contribute towards the development of new antibiotics in our ongoing fight  
291 against recalcitrant Gram-negative infections.

292

## 293 **Experimental Procedures**

294

### 295 Bacterial strains and growth conditions

296 All the strains used in this study are listed in Table S1. *Escherichia coli* strain MC4100  
297 [*F* *araD139*  $\Delta$ (*argF-lac*) *U169 rpsL150 relA1 flbB5301 ptsF25 deoC1 ptsF25 thi*] (Casadaban,  
298 1976) was used as the wild-type (WT) strain for most of the experiments. To achieve  
299 accumulation of phosphatidylserine (PS) in cells, a temperature-sensitive phosphatidylserine  
300 decarboxylase mutant (*psd2*), which accumulates PS at the non-permissive temperature, was  
301 used (Hawrot and Kennedy, 1978). NR754, an *araD*<sup>+</sup> revertant of MC4100 (Ruiz et al., 2008),  
302 was used as the WT strain for experiments involving overexpression of *lpxC* from the arabinose-  
303 inducible promoter ( $P_{BAD}$ ).  $\Delta$ *tolQ*,  $\Delta$ *tolA* and  $\Delta$ *tol-pal* deletions were constructed using  
304 recombineering (Datsenko and Wanner, 2000) and all other gene deletion strains were obtained  
305 from the Keio collection (Baba et al., 2006). Whenever needed, the antibiotic resistance cassettes  
306 were flipped out as described (Datsenko and Wanner, 2000). Gene deletion cassettes were  
307 transduced into relevant genetic background strains via P1 transduction (Silhavy *et al.*, 1984).  
308 Luria-Bertani (LB) broth (1% tryptone and 0.5% yeast extract, supplemented with 1% NaCl) and  
309 agar were prepared as previously described (Silhavy *et al.*, 1984). Strains were grown in LB  
310 medium with shaking at 220 rpm at either 30°C, 37°C, or 42°C, as indicated. When appropriate,  
311 kanamycin (Kan; 25  $\mu$ g ml<sup>-1</sup>), chloramphenicol (Cam; 30  $\mu$ g ml<sup>-1</sup>) and ampicillin (Amp; 125  $\mu$ g  
312 ml<sup>-1</sup>) were added.

313

### 314 Plasmid construction

315 All the plasmids used in this study are listed in Table S2. Desired genes were amplified  
316 from MC4100 chromosomal DNA using the indicated primers (sequences in Table S3).

317 Amplified products were digested with indicated restriction enzymes (New England Biolabs),  
318 which were also used to digest the carrying vector. After ligation, recombinant plasmids were  
319 transformed into competent NovaBlue (Novagen) cells and selected on LB plates containing  
320 appropriate antibiotics. DNA sequencing (Axil Scientific, Singapore) was used to verify the  
321 sequence of the cloned gene.

322 To generate *tolR<sub>D23R</sub>* mutant construct, site-directed mutagenesis was conducted using  
323 relevant primers listed in Table S3 with pET23/42*tolR* as the initial template. Briefly, the entire  
324 template was amplified by PCR and the resulting PCR product mixture digested with DpnI for >  
325 1 h at 37°C. Competent NovaBlue cells were transformed with 1 µl of the digested PCR product  
326 and plated onto LB plates containing ampicillin. DNA sequencing (Axil Scientific, Singapore)  
327 was used to verify the introduction of the desired mutation.

328

### 329 Analysis of [<sup>32</sup>P]-labelled lipid A

330 Mild acid hydrolysis was used to isolate lipid A as previously described (Zhou *et al.*,  
331 1999) with some modifications. 5-ml cultures were grown in LB broth (inoculated from an  
332 overnight culture at 1:100 dilution) containing [<sup>32</sup>P]-disodium phosphate (final 1 µCi ml<sup>-1</sup>; Perkin  
333 Elmer product no. NEX011001MC) till mid-log phase (OD<sub>600</sub> ~0.5 - 0.7). One MC4100 WT  
334 culture labelled with [<sup>32</sup>P] was treated with EDTA (25 mM pH 8.0) for 10 min prior to  
335 harvesting. Cells were harvested at 4,700 x g for 10 min, washed twice with 1 ml PBS (137 mM  
336 NaCl, 2.7 mM KCl, 10 mM Na<sub>2</sub>HPO<sub>4</sub>, 1.8 mM KH<sub>2</sub>PO<sub>4</sub>, pH 7.4) and suspended in PBS (0.32  
337 ml) again. Chloroform (0.4 ml) and methanol (0.8 ml) were added and the mixtures were  
338 incubated at room temperature for 20 min with slow shaking (60 rpm) to make the one-phase  
339 Bligh-Dyer mixture (chloroform:methanol:water = 1:2:0.8). Mixtures were then centrifuged at  
340 21,000 x g for 30 min. Pellets obtained were washed once with fresh one-phase Bligh-Dyer

341 system (1 ml) and centrifuged as above. Resulting pellets were suspended in 0.45 ml of sodium  
342 acetate (12.5 mM, pH 4.5) containing SDS (1 %) and heated at 100°C for 30 min. After cooling  
343 to room temperature, chloroform and methanol (0.5 ml each) were added to create a two-phase  
344 Bligh-Dyer mixture (chloroform:methanol:water = 2:2:1.8). The lower (organic) phase of each  
345 mixture was collected after phase partitioning via centrifugation at 21,000 x g for 30 min. This  
346 was washed once with upper phase (0.5 ml) of freshly prepared two-phase Bligh-Dyer mixture  
347 and centrifuged as above. Finally, all the collected lower phases containing [<sup>32</sup>P]-labelled lipid A  
348 were air-dried overnight. Dried radiolabelled lipid A samples were suspended in 50 µl of  
349 chloroform:methanol (2:1) and equal amounts (~1,000 cpm) of radioactivity were spotted on  
350 silica-gel coated TLC (Thin Layer Chromatography) plates (Merck). TLCs were developed in  
351 chambers pre-equilibrated overnight with solvent system chloroform:pyridine:98 % formic  
352 acid:water (50:50:14.6:5). TLC plates were air-dried overnight and later visualized by phosphor  
353 imaging (STORM, GE healthcare). The densitometric analysis of the spots obtained on the  
354 phosphor images of TLCs was carried out using ImageQuant TL analysis software (version 7.0,  
355 GE Healthcare). Average levels of hepta-acylated lipid A (expressed as a percentage of total  
356 lipid A in each sample) were obtained from three independent experiments.

357

#### 358 Sucrose density gradient fractionation

359 Sucrose density gradient centrifugation was performed as previously described (Chng *et*  
360 *al.*, 2010) with some modifications. For each strain, a 10/50-ml culture (inoculated from an  
361 overnight culture at 1:100 dilution) was grown in LB broth until OD<sub>600</sub> reached ~0.5 – 0.7. For  
362 radiolabeling, indicated radioisotopes were added from the start of inoculation. Cells were  
363 harvested by centrifugation at 4,700 x g for 10 min, suspended to wash once in 5 ml of cold  
364 Buffer A (Tris-HCl, 10 mM pH 8.0), and centrifuged as above. Cells were resuspended in 6 ml



365 of Buffer B (Tris-HCl, 10 mM pH 8.0 containing 20% sucrose (w/w), 1 mM PMSF and 50  $\mu$ g ml  
366 <sup>-1</sup> DNase I), and lysed by a single passage through a high pressure French press (French Press G-  
367 M, Glen Mills) homogenizer at 8,000 psi. Under these conditions, lipid mixing between inner  
368 and outer membranes is minimal (Chng *et al.*, 2010). Unbroken cells were removed by  
369 centrifugation at 4,700 x g for 10 min. The cell lysate was collected, and 5.5 ml of cell lysate was  
370 layered on top of a two-step sucrose gradient consisting of 40% sucrose solution (5 ml) layered  
371 on top of 65% sucrose solution (1.5 ml) at the bottom of the tube. All sucrose (w/w) solutions  
372 were prepared in Buffer A. Samples were centrifuged at 39,000 rpm for 16 h in a Beckman  
373 SW41 rotor in an ultracentrifuge (Model XL-90, Beckman). 0.8-ml fractions (usually 15  
374 fractions) were manually collected from the top of each tube.

375

#### 376 Analysis of OMP and LPS levels in isolated OMs

377 OM fragments were isolated from 50 ml of cells following growth, cell lysis and  
378 application of sucrose density gradient fractionation, as described above. Instead of manual  
379 fractionation, OM fragments (~1 ml) were isolated from the 40%/65% sucrose solution interface  
380 by puncturing the side of the tube with a syringe. Buffer A (1 ml) was added to the OM  
381 fragments to lower the sucrose concentration and reduce viscosity. The OM fragments were then  
382 pelleted in a microcentrifuge at 21,000 x g for 30 min and then resuspended in 200 - 250  $\mu$ l  
383 Buffer A. Protein concentrations of these OM preparations were determined using Bio-Rad *D*<sub>C</sub>  
384 protein assay. The same amount of OM (based on protein content) for each strain was analyzed  
385 by reducing SDS-PAGE and immunoblotted using antibodies directed against OmpC, OmpF,  
386 LamB, BamA, LptE and LPS. For LPS quantification, five-fold serial dilutions of WT OMs were  
387 ran alongside the other OM samples as standards. Densitometric analysis of the LPS bands was  
388 carried out using ImageJ analysis software, and calibrated using ratio standard curves generated

389 from the serial dilution standards (Pitre *et al.*, 2007). LPS levels found in the OMs of indicated  
390 strains were normalized to WT. This quantification was performed three times for the same  
391 samples, and the average data was plotted.

392

### 393 Analysis of steady-state [<sup>3</sup>H]-glycerol-labelled PL distribution in IMs and OMs

394 To specifically label cellular PLs, 10-ml cells were grown at 37°C in LB broth  
395 (inoculated from an overnight culture at 1:100 dilution) containing [2-<sup>3</sup>H]-glycerol (final 1 μCi  
396 ml<sup>-1</sup>; Perkin Elmer product no. NET022L001MC) until OD<sub>600</sub> reached ~0.5 - 0.7. Once the  
397 desired OD<sub>600</sub> was achieved, cultures were immediately mixed with ice-cold Buffer A containing  
398 CCCP (50 μM) to stop the labeling of the cultures. Cells were pelleted, lysed, and fractionated  
399 on sucrose density gradients, as described above. 0.8-ml fractions were collected from each tube,  
400 as described above, and 300 μl from each fraction was mixed with 2 ml of Ultima Gold  
401 scintillation fluid (Perkin Elmer, Singapore). Radioactivity ([<sup>3</sup>H]-count) was measured on a  
402 scintillation counter (MicroBeta<sup>2</sup>®, Perkin-Elmer). Based on [<sup>3</sup>H]-profiles, IM and OM peaks  
403 were identified and peak areas determined after background subtraction (average count of first 5  
404 fractions was taken as background). For each strain, relative [<sup>3</sup>H]-PL levels in the IM and OM  
405 were expressed as a percentage of the sum in both membranes (see Fig. 2A upper panel). The  
406 average percent [<sup>3</sup>H]-PL in the OM for each strain (obtained from three independent  
407 experiments) was then compared to that for the WT strain to calculate fold changes (see Fig. 2B  
408 lower panel).

409

410 Determination of PL/LPS ratios in [<sup>14</sup>C]-acetate labelled OMs (see Fig. S5 for workflow and  
411 results)

412 To specifically label all cellular lipids (including LPS), 10-ml cells were grown at 37°C  
413 in LB broth (inoculated from an overnight culture at 1:100 dilution) containing [1-<sup>14</sup>C]-acetate  
414 (final 0.2 μCi ml<sup>-1</sup>; Perkin Elmer product no. NEC084A001MC) until OD<sub>600</sub> reached ~0.5 – 0.7.  
415 At this OD, cultures were transferred immediately to ice-cold Buffer A (5 ml), pelleted, lysed,  
416 and fractionated on sucrose density gradients, as described above. 0.8-ml fractions were  
417 collected from each tube, as described above, and 50 μl from each fraction was mixed with 2 ml  
418 of Ultima Gold scintillation fluid (Perkin Elmer, Singapore). Based on [<sup>14</sup>C]-profiles, IM and  
419 OM peaks were identified. OM fractions were then pooled, and treated as outlined below to  
420 differentially extract PLs and LPS for relative quantification within each OM pool. For each  
421 strain, the whole experiment was conducted and the OM PL/LPS ratio obtained three times.

422 Each OM pool (0.32 ml) was mixed with chloroform (0.4 ml) and methanol (0.8 ml) to  
423 make a one-phase Bligh-Dyer mixture (chloroform:methanol:water = 1:2:0.8). The mixtures  
424 were vortexed for 2 min and later incubated at room temperature for 20 min with slow shaking at  
425 60 rpm. After centrifugation at 21,000 x g for 30 min, the supernatants (S1) were collected. The  
426 resulting pellets (P1) were washed once with fresh 0.95 ml one-phase Bligh-Dyer solution and  
427 centrifuged as above. The insoluble pellets (P2) were air dried and used for LPS quantification  
428 (see below). The supernatants obtained in this step (S2) were combined with S1 to get the  
429 combined supernatants (S3), which contained radiolabelled PLs. To these, chloroform (0.65 ml)  
430 and methanol (0.65 ml) were added to convert them to two-phase Bligh-Dyer mixtures  
431 (chloroform:methanol:water = 2:2:1.8). After a brief vortexing step, the mixtures were  
432 centrifuged at 3000 x g for 10 min to separate the immiscible phases, and the lower organic  
433 phases were collected. These were washed once with equal volumes of water and centrifuged as  
434 above, and the lower organic phases (containing radiolabelled PLs) recollected and air dried.  
435 Finally, the dried PLs were dissolved in 50 μl of a mixture of chloroform:methanol (2:1). Equal

436 volumes (20  $\mu$ l) of PL solutions were mixed with 2 ml of Ultima Gold scintillation fluid (Perkin  
437 Elmer, Singapore). The [ $^{14}$ C]-counts were measured using scintillation counting (MicroBeta<sup>2</sup><sup>®</sup>,  
438 Perkin-Elmer) and taken as the levels of PLs isolated from the OMs.

439 To quantify LPS, the P2 pellets were suspended in 2X reducing SDS-PAGE loading  
440 buffer (40  $\mu$ l) and boiled for 10 min. Equal volumes (15  $\mu$ l) were loaded and subjected to SDS-  
441 PAGE (15% Tris.HCl). Gels were air-dried between porous films (Invitrogen) and exposed to  
442 the same phosphor screen along with standards (GE healthcare). To generate a standard curve for  
443 LPS quantification, the WT OM pellet sample was serially diluted two-fold and equal volumes  
444 of diluted samples were resolved on SDS-PAGE and dried as above. The densitometric analysis  
445 of bands (i.e. LPS from each OM) was carried out using ImageQuant TL analysis software  
446 (version 7.0, GE Healthcare). To allow proper comparison and quantification, the LPS gels from  
447 triplicate experiments were exposed on the same phosphor screen along with the standards (see  
448 Fig. S5).

449 For each strain, the arbitrary PL/LPS ratio in the OM was obtained by taking the levels of  
450 PLs (represented by [ $^{14}$ C]-counts of PL fraction) divided by the LPS levels (represented by gel  
451 band density), averaged across three independent replicates (see Fig. 5C and Fig. 2B upper  
452 panel). The average PL/LPS ratio in the OM for each strain was then compared to that for the  
453 WT strain to calculate fold changes (see Fig. 2B lower panel).

454

#### 455 Quantification of OM vesiculation

456 For each strain, 10-ml cells were grown at 37°C in LB broth (inoculated from an  
457 overnight culture at 1:100 dilution) containing [ $^{14}$ C]-acetate (final 0.2  $\mu$ Ci ml<sup>-1</sup>; Perkin Elmer  
458 product no. NEC084A001MC) until OD<sub>600</sub> reached ~0.7. At this OD, cultures were harvested to  
459 obtain the cell pellets, and supernatants containing OM vesicles. Cell pellets were washed twice

460 with Buffer A and finally suspended in the same buffer (0.2 ml). To obtain OM vesicles,  
461 supernatants were filtered through 0.45  $\mu\text{m}$  filters followed by ultracentrifugation in a SW41.Ti  
462 rotor at 39,000 rpm for 1 h. Finally, the OM vesicles in the resulting pellets were washed and re-  
463 suspended in 0.2 ml of Buffer A. Radioactive counts in cell pellets and OM vesicles were  
464 measured after mixing with 2 ml of Ultima Gold scintillation fluid (Perkin Elmer, Singapore).  
465 Radioactivity ( $[^{14}\text{C}]$ -count) was measured on a scintillation counter (MicroBeta<sup>2</sup><sup>®</sup>, Perkin-  
466 Elmer).

467

#### 468 PG/CL turnover assay (pulse-chase and single time-point (2-h) analysis)

469 PG/CL turnover pulse-chase experiments were performed using the *psd2* background,  
470 which accumulated PS and PG/CL during growth at restrictive temperature. For each strain, cells  
471 were grown in 70 ml LB broth (inoculated from an overnight culture at 1:100 dilution) at the  
472 permissive temperature (30°C) until OD<sub>600</sub> reached ~0.15 - 0.2. The culture was then shifted for  
473 4 h at the restrictive temperature (42°C) and labelled with [<sup>32</sup>P]-disodium phosphate (final 1  $\mu\text{Ci}$   
474  $\text{ml}^{-1}$ ) during the last 30 min at the restrictive temperature (42°C). After labeling, cells were  
475 harvested by centrifugation at 4,700 x  $g$  for 10 min, washed once with cold LB broth (10 ml) and  
476 centrifuged again at 4,700 x  $g$  for 10 min. Cells were then resuspended in fresh LB broth (70 ml)  
477 and the chase was started in the presence of non-radioactive disodium phosphate (1000-fold  
478 molar excess) at either the permissive temperature, with or without addition of carbonyl cyanide  
479 *m*-chlorophenyl hydrazone (CCCP; 50  $\mu\text{M}$ ), or at the restrictive temperature in the presence of  
480 hydroxylamine (HA; 10 mM). At the start (0 min) and different times (15, 30, 45, 90 and 120  
481 min) during the chase, a portion of the culture (either 15 ml or 10 ml) was collected and mixed  
482 immediately with equal volume of ice-cold Buffer A containing CCCP (50  $\mu\text{M}$ ) and  
483 hydroxylamine (10 mM). Cells were harvested by centrifugation at 4,700 x  $g$  for 10 min and then

484 resuspended in 6 ml of Buffer B containing CCCP (50  $\mu$ M) and hydroxylamine (10 mM). Cells  
485 were lysed, and fractionated on sucrose density gradients, as described above. 0.8-ml fractions  
486 were collected from each tube, as described above. Fractions 7-9 and 12-14 contained the IM and  
487 OM fractions, respectively. To extract PLs from the IM and OM pools (2.4 ml), methanol (6 ml)  
488 and chloroform (3 ml) were added to make one-phase Bligh-Dyer mixtures. These were  
489 incubated at room temperature for 60 min with intermittent vortexing. Chloroform (3 ml) and  
490 sterile water (3 ml) were then added to generate two-phase Bligh-Dyer mixtures. After brief  
491 vortexing, the lower organic phases were separated from the top aqueous phases by  
492 centrifugation at 3,000 x g for 10 min. These were washed once with equal volumes of water and  
493 centrifuged as above, and the lower organic phases (containing radiolabelled PLs) recollected  
494 and air dried. Finally, the dried PLs were dissolved in 40  $\mu$ l of a mixture of chloroform:methanol  
495 (2:1) and spotted onto silica-gel coated TLC plates (Merck). Equal amounts (in cpm) of  
496 radioactivity were spotted for each sample. TLCs were developed in pre-equilibrated chambers  
497 containing solvent system chloroform:methanol:water (65:25:4). TLC plates were dried, and  
498 visualized by phosphor imaging (STORM, GE healthcare). Densitometric analysis of the PL  
499 spots on the phosphor image of TLCs was conducted using the ImageQuant TL analysis software  
500 (version 7.0, GE Healthcare). The levels of each major PL species were expressed as a  
501 percentage of all detected PL species (essentially the whole lane), and plotted against time (see  
502 Fig. 3 and Fig. S8).

503 For single time-point analysis, 30-ml cultures were grown and labelled with [ $^{32}$ P]-  
504 disodium phosphate (final 1  $\mu$ Ci ml $^{-1}$ ) at the restrictive temperature. For strains harboring  
505 plasmids used for overexpressing OmpC-Mla components, arabinose (0.2 %) was added during  
506 growth at the permissive as well as restrictive temperatures. After washing and resuspension in  
507 fresh LB broth (30 ml), the chase was started in the presence of non-radioactive disodium

508 phosphate (1000-fold molar excess) at the permissive temperature. At start (0 h) and 2 h during  
509 the chase, a portion of the culture (15 and 10 ml) was collected and processed similarly as pulse  
510 chase analysis described above. The levels of PG/CL in the membranes at each time point were  
511 expressed as a percentage of the sum of PE, PS and PG/CL. For each strain, IM and OM PG/CL  
512 turnover were expressed as the difference between percentage PG/CL levels at 0-h and 2-h time  
513 points divided by that at 0-h. Average PG/CL turnover values were obtained from three  
514 independent experiments conducted (see Fig. 4 and Fig. S9).

515

#### 516 OM permeability assay

517 OM sensitivity against SDS/EDTA was judged by colony-forming unit (cfu) analyses on  
518 LB agar plates containing indicated concentrations of SDS/EDTA. Briefly, 5-ml cultures were  
519 grown (inoculated with overnight cultures at 1:100 dilution) in LB broth at 37°C until OD<sub>600</sub>  
520 reached ~1.0. Cells were normalized according to OD<sub>600</sub>, first diluted to OD<sub>600</sub> = 0.1 (~10<sup>8</sup> cells),  
521 and then serial diluted in LB with seven 10-fold dilutions using 96-well microtiter plates  
522 (Corning). Two microliters of the diluted cultures were manually spotted onto the plates and  
523 incubated overnight at 37°C.

524

#### 525 LpxC overexpression (growth curves and viability assay)

526 For each strain, a 10-ml culture was inoculated in LB broth supplemented with arabinose  
527 (0.2 %) from the overnight culture to make the initial OD<sub>600</sub> of 0.05. Cells were grown at 37°C  
528 and the OD<sub>600</sub> of the cultures was measured hourly. At the start of growth (0 h) and at 4 and 7 h  
529 during growth, 100 µl of cells were collected and then serial diluted in LB/cam with six 10-fold  
530 dilutions using 96-well microtiter plates (Corning). Five microliters of the non-diluted and

531 diluted cultures were manually spotted on LB/cam agar plates (no arabinose). Plates were  
532 incubated overnight at 37°C.

533

#### 534 IM (NADH activity) and OM marker (LPS) analysis during sucrose gradient fractionation

535 The inner membrane enzyme, NADH oxidase, was used as a marker for the IM; its  
536 activity was measured as previously described (Chng *et al.*, 2010). Briefly, 30 µl of each fraction  
537 from the sucrose density gradient was diluted 4-fold with 20 mM Tris.HCl, pH 8.0 in a 96-well  
538 format and 120 µl of 100 mM Tris.HCl, pH 8.0 containing 0.64 mM NADH (Sigma) and 0.4  
539 mM dithiothreitol (DTT, Sigma) was added. Changes in fluorescence over time due to changes  
540 in NADH ( $\lambda_{ex} = 340$  nm,  $\lambda_{em} = 465$  nm) concentration was monitored using a plate reader  
541 (Perkin Elmer). The activity of NADH oxidase in pooled IM and OM fractions relative to the  
542 sum of these fractions was determined.

543 LPS was used as a marker for the OM and detected using LPS dot blots. OM fractions  
544 were pooled together and 2 µl of the fractions were spotted on nitrocellulose membranes (Bio-  
545 Rad). Spotted membranes were allowed to dry at room temperature for 1 h and then the  
546 membranes were probed with antibodies against LPS.

547

#### 548 SDS-PAGE and immunoblotting

549 All samples subjected to SDS-PAGE were mixed with 2X Laemmli reducing buffer and  
550 boiled for 10 min at 100°C. Equal volumes of the samples were loaded onto the gels. Unless  
551 otherwise stated, SDS-PAGE was performed according to Laemmli using the 12% or 15%  
552 Tris.HCl gels (Laemmli, 1970). Immunoblotting was performed by transferring protein bands  
553 from the gels onto polyvinylidene fluoride (PVDF) membranes (Immun-Blot® 0.2 µm, Bio-Rad)  
554 using the semi-dry electroblotting system (Trans-Blot® Turbo™ Transfer System, Bio-Rad).



555 Membranes were blocked using 1X casein blocking buffer (Sigma). Mouse monoclonal  $\alpha$ -OmpC  
556 antibody was a gift from Swaine Chen and used at a dilution of 1:5,000 (Khetrapal et al., 2015).  
557 Rabbit  $\alpha$ -LptE (from Daniel Kahne) (Chng et al., 2010) and  $\alpha$ -OmpF antisera (Rajeev Misra)  
558 (Charlson et al., 2006) were used at 1:5,000 dilutions. Rabbit  $\alpha$ -BamA antisera (from Daniel  
559 Kahne) was used at 1:40,000 dilution. Rabbit  $\alpha$ -LpxC antisera (generous gift from Franz  
560 Narberhaus) was used at 1:5,000 dilution. Mouse monoclonal  $\alpha$ -LPS antibody (against LPS-core)  
561 was purchased from Hycult biotechnology and used at 1:5,000 dilutions. Rabbit polyclonal  $\alpha$ -  
562 LamB antibodies was purchased from Bioss (USA) and used at 1:1,000 dilution.  $\alpha$ -mouse IgG  
563 secondary antibody conjugated to HRP (from sheep) and  $\alpha$ -rabbit IgG secondary antibody  
564 conjugated to HRP (from donkey) were purchased from GE Healthcare and used at 1:5,000  
565 dilutions. Luminata Forte Western HRP Substrate (Merck Milipore) was used to develop the  
566 membranes and chemiluminescent signals were visualized by G:BOX Chemi XT 4 (Genesys  
567 version1.3.4.0, Syngene).

568

569 **Acknowledgments**

570

571 We thank Zhi-Soon Chong for constructing the  $\Delta mlaC$  allele, and Chee-Geng Chia for  
572 performing preliminary experiments. We are grateful to Swaine Chen (NUS), Rajeev Misra  
573 (Arizona State U), Daniel Kahne (Harvard U) and Franz Narberhous (RUHR Universitat  
574 Bochum) for their generous gifts of  $\alpha$ -OmpC,  $\alpha$ -OmpF,  $\alpha$ -LptE and  $\alpha$ -BamA, and  $\alpha$ -LpxC  
575 antibodies, respectively. Finally, we thank William F. Burkholder (Institute of Molecular and  
576 Cell Biology) and Jean-Francois Collet (U Catholique de Louvain) for critical comments and  
577 suggestions on the manuscript. This work was supported by the National University of Singapore  
578 Start-up funding, the Singapore Ministry of Education Academic Research Fund Tier 1 and Tier  
579 2 (MOE2013-T2-1-148) grants, and the Singapore Ministry of Health National Medical Research  
580 Council under its Cooperative Basic Research Grant (NMRC/CBRG/0072/2014) (all to S.-S.C.).

581

582 **Author contributions:**

583

584 R.S. performed all experiments described in this work; X.E.J. performed experiments related to  
585 LpxC overexpression; R.S. and S.-S.C. analyzed and discussed data; R.S. and S.-S.C. wrote the  
586 paper.

587

588 **Competing financial interests**

589

590 The authors declare no conflict of interest.

591

592

593 **References**

594

595 Audet, A., Cole, R., and Proulx, P. (1975) Polyglycerophosphatide metabolism in *Escherichia*  
596 *coli*. *Biochim Biophys Acta* **380**: 414-420.

597 Baba, T., Ara, T., Hasegawa, M., Takai, Y., Okumura, Y., Baba, M., *et al.* (2006) Construction  
598 of *Escherichia coli* K-12 in-frame, single-gene knockout mutants: the Keio collection. *Mol*  
599 *Syst Biol* **2**: 2006.0008.

600 Bayer, M. E. (1991) Zones of membrane adhesion in the cryofixed envelope of *Escherichia coli*.  
601 *J Struct Biol* **107**: 268-280.

602 Bernadac, A., Gavioli, M., Lazzaroni, J.C., Raina, S., Lloubes, R. (1998) *Escherichia coli tol-pal*  
603 mutants form outer membrane vesicles. *J Bacteriol* **180**: 4872-4878.

604 Bernstein, A., Rolfe, B., and Onodera, K. (1972) Pleiotropic properties and genetic organization  
605 of the *tolA, B* locus of *Escherichia coli* K-12. *J Bacteriol* **112**: 74-83.

606 Bishop, R.E. (2005) The lipid A palmitoyltransferase PagP: molecular mechanisms and role in  
607 bacterial pathogenesis. *Mol Microbiol* **57**: 900-912.

608 Carr, S., Penfold, C.N., Bamford, V., James, R., and Hemmings, A.M. (2000) The structure of  
609 TolB, an essential component of the *tol*-dependent translocation system, and its protein-  
610 protein interaction with the translocation domain of colicin E9. *Structure* **8**: 57-66.

611 Casadaban, M.J. (1976) Transposition and fusion of the *lac* genes to selected promoters  
612 in *Escherichia coli* using bacteriophage lambda and Mu. *J Mol Biol* **104**: 541-555.

613 Cascales, E., Gavioli, M., Sturgis, J.N., and Lloubes, R. (2000) Proton motive force drives the  
614 interaction of the inner membrane TolA and outer membrane Pal proteins in *Escherichia coli*.  
615 *Mol Microbiol* **38**: 904-915.

- 616 Cascales, E., Lloubes, R., and Sturgis, J.N. (2001) The TolQ-TolR proteins energize TolA and  
617 share homologies with the flagellar motor proteins MotA-MotB. *Mol Microbiol* **42**: 795-807.
- 618 Cascales, E., Buchanan, S.K., Duche, D., Kleanthous, C., Lloubes, R., Postle, K., *et al.* (2007)  
619 Colicin biology. *Microbiol Mol Biol Rev* **71**: 158-229.
- 620 Celia, H., Noinaj, N., Zakharov, S.D., Bordignon, E., Botos, I., Santamaria, M., *et al.* (2016)  
621 Structural insight into the role of the Ton complex in energy transduction. *Nature* **538**: 60-65.
- 622 Charlson, E.S., Werner, J.N., and Misra, R. (2006) Differential effects of *yfgL* mutation on  
623 *Escherichia coli* outer membrane proteins and lipopolysaccharide. *J Bacteriol* **188**: 7186-  
624 7194.
- 625 Chong, Z.S., Woo, W.F., and Chng, S.S. (2015) Osmoporin OmpC forms a complex with MlaA  
626 to maintain outer membrane lipid asymmetry in *Escherichia coli*. *Mol Microbiol* **98**: 1133-  
627 1146.
- 628 Chng, S.S., Gronenberg, L.S., and Kahne, D. (2010) Proteins required for lipopolysaccharide  
629 transport in *Escherichia coli* form a transenvelope complex. *Biochemistry* **49**: 4565-4567.
- 630 Clavel, T., Lazzaroni, J.C., Vianney, A., and Portalier, R. (1996) Expression of the *tolQRA* genes  
631 of *Escherichia coli* K-12 is controlled by the RcsC sensor protein involved in capsule  
632 synthesis. *Mol Microbiol* **19**: 19-25.
- 633 Cronan, J.E. (2003) Bacterial membrane lipids: where do we stand? *Annu Rev Microbiol* **57**:  
634 203-224.
- 635 Dalebroux, Z.D., Matamouros, S., Whittington, D., Bishop, R.E., and Miller, S.I. (2014) PhoPQ  
636 regulates acidic glycerophospholipid content of the *Salmonella typhimurium* outer membrane.  
637 *Proc Natl Acad Sci USA* **111**: 1963-1968.
- 638 Datsenko, K.A., and Wanner, B.L. (2000) One-step inactivation of chromosomal genes in  
639 *Escherichia coli* K-12 using PCR products. *Proc Natl Acad Sci USA* **97**: 6640-6645.

- 640 Dennis, J.J., Lafontaine, E.R., and Sokol, P.A. (1996) Identification and characterization of the  
641 *tolQRA* genes of *Pseudomonas aeruginosa*. *J Bacteriol* **178**: 7059-7068.
- 642 Deprez, C., Lloubes, R., Gavioli, M., Marion, D., Guerlesquin, F., and Blanchard, L. (2005)  
643 Solution structure of the *E. coli* TolA C-terminal domain reveals conformational changes  
644 upon binding to the phage g3p N-terminal domain. *J Mol Biol* **346**: 1047-1057.
- 645 Donohue-Rolfe, A.M., and Schaechter, M. (1980) Translocation of phospholipids from the inner  
646 to the outer membrane of *Escherichia coli*. *Proc Natl Acad Sci USA* **77**: 1867-1871.
- 647 Ekiert, D.C., Bhabha, G., Isom, G.L., Greenan, G., Ovchinnikov, S., Henderson, I.R., *et al.*  
648 (2017) Architectures of lipid transport systems for the bacterial outer membrane. *Cell* **169**:  
649 273-285.e17.
- 650 Faure, L.M., Fiche, J.B., Espinosa, L., Ducret, A., Anantharaman, V., Luciano, J., *et al.* (2016)  
651 The mechanism of force transmission at bacterial focal adhesion complexes. *Nature* **539**: 530-  
652 535.
- 653 Fuhrer, F., Langklotz, S., and Narberhaus, F. (2006) The C-terminal end of LpxC is required for  
654 degradation by the FtsH protease. *Mol Microbiol* **59**: 1025-1036.
- 655 Gerding, M.A., Ogata, Y., Pecora, N.D., Niki, H., and de Boer, P.A.J. (2007) The trans-envelope  
656 Tol-Pal complex is part of the cell division machinery and required for proper outer-  
657 membrane invagination during cell constriction in *E. coli*. *Mol Microbiol* **63**: 1008-1025.
- 658 Germon, P., Ray, M.C., Vianney, A., and Lazzaroni, J.C. (2001) Energy-dependent  
659 conformational changes in the TolA protein of *Escherichia coli* involves its N-terminal  
660 domain, TolQ, and TolR. *J Bacteriol* **183**: 4110-4114.
- 661 Gresock, M.G., Kastead, K.A., and Postle, K. (2015) From homodimer to heterodimer and back:  
662 elucidating the TonB energy transduction cycle. *J Bacteriol* **197**: 3433-3445.

- 663 Godlewska, R., Wisniewska, K., Pietras, Z., and Jagusztyn-Krynicka, E.K. (2009)  
664 Peptidoglycan-associated lipoprotein (Pal) of Gram-negative bacteria: function, structure, role  
665 in pathogenesis and potential application in immunoprophylaxis. *FEMS Microbiol Lett* **298**:  
666 1-11.
- 667 Gully, D., and Bouveret, E. (2006) A protein network for phospholipid synthesis uncovered by a  
668 variant of the tandem affinity purification method in *Escherichia coli*. *Proteomics* **6**: 282-293.
- 669 Guzman, L.M., Belin, D., Carson, M.J., and Beckwith, J. (1995) Tight regulation, modulation,  
670 and high-level expression by vectors containing the arabinose P<sub>BAD</sub> promoter. *J Bacteriol* **177**:  
671 4121-4130.
- 672 Hagan, C.L., Silhavy, T.J., and Kahne, D. (2011)  $\beta$ -barrel membrane protein assembly by the  
673 Bam complex. *Annu Rev Biochem* **80**: 189-210.
- 674 Hawrot, E., and Kennedy, E.P. (1978) Phospholipid composition and membrane function in  
675 phosphatidylserine decarboxylase mutants of *Escherichia coli*. *J Biol Chem* **253**: 8213-8220.
- 676 Hirschberg, C.B., and Kennedy, E.P. (1977) Mechanisms of the enzymatic synthesis of  
677 cardiolipin in *Escherichia coli*. *Proc Natl Acad Sci USA* **69**: 648-651.
- 678 Jacquier, N., Frandi, A., Viollier, P.H., and Greub, G. (2015) Disassembly of a medial  
679 transenvelope structure by antibiotics during intracellular division. *Chem Biol* **22**: 1217-1227.
- 680 Jones, N.C., and Osborn, M.J. (1977) Translocation of phospholipids between the outer and inner  
681 membranes of *Salmonella typhimurium*. *J Biol Chem* **252**: 7405-7412.
- 682 Kanemasa, Y., Akamatsu, Y., and Nojima, S. (1967) Composition and turnover of the  
683 phospholipids in *Escherichia coli*. *Biochim Biophys Acta* **144**: 382-390.
- 684 Kanfer, J., and Kennedy, E.P. (1963) Metabolism and function of bacterial lipids I. Metabolism  
685 of phospholipids in *Escherichia coli* B. *J Biol Chem* **238**: 2919-2922.

- 686 Khetrupal, V., Mehershahi, K., Rafee, S., Chen, S., Lim, C.L., and Chen, S.L. (2015) A set of  
687 powerful negative selection systems for unmodified Enterobacteriaceae. *Nucleic Acids Res*  
688 **43**: e83.
- 689 Laemmli, U.K. (1970) Cleavage of structural proteins during the assembly of the head of  
690 bacteriophage T4. *Nature* **227**: 680-685.
- 691 Langley, K.E., Hawrot, E., and Kennedy, E.P. (1982) Membrane assembly: movement of  
692 phosphatidylserine between the cytoplasmic and outer membranes of *Escherichia coli*. *J*  
693 *Bacteriol* **152**: 1033-1041.
- 694 Lazzaroni, J.C., and Portalier, R.C. (1981) Genetic and biochemical characterization of  
695 periplasmic-leaky mutants of *Escherichia coli* K-12. *J Bacteriol* **145**: 1351-1358.
- 696 Llobes, R., Cascales, E., Walburger, A., Bouveret, E., Lazdunski, C., Bernadac, A., *et al.*  
697 (2001) The Tol-Pal proteins of the *Escherichia coli* cell envelope: an energized system  
698 required for outer membrane integrity? *Res Microbiol* **152**: 523-529.
- 699 Lo Sciuto, A., Fernandez-Pinar, R., Bertuccini, L., Losi, F., Superti, F., Imperi, F. (2014) The  
700 periplasmic protein TolB as a potential drug target in *Pseudomonas aeruginosa*. *PLoS One* **9**:  
701 e103784.
- 702 Malinverni, J.C., and Silhavy, T.J. (2009) An ABC transport system that maintains lipid  
703 asymmetry in the Gram-negative outer membrane. *Proc Natl Acad Sci USA* **106**: 8009-8014.
- 704 McMahon, H.T., and Gallop, J.L. (2005) Membrane curvature and mechanisms of dynamic cell  
705 membrane remodelling. *Nature* **438**: 590-596.
- 706 Nikaido, H. (2003) Molecular basis of bacterial outer membrane permeability revisited.  
707 *Microbiol Mol Biol Rev* **67**: 593-656.

- 708 Nakayama, T., and Zhang-Akiyama, Q.M. (2016) *pqiABC* and *yebST*, putative mce operons of  
709 *Escherichia coli*, encode transport pathways and contribute to membrane integrity. *J Bacteriol*  
710 **199**: e00606-16.
- 711 Okuda, S., Sherman, D.J., Silhavy, T.J., Ruiz, N., and Kahne, D. (2016) Lipopolysaccharide  
712 transport and assembly at the outer membrane: the PEZ model. *Nat Rev Microbiol* **14**: 337-  
713 345.
- 714 Okuda, S., and Tokuda, H. (2011) Lipoprotein sorting in bacteria. *Annu Rev Microbiol* **65**: 239-  
715 259.
- 716 Pitre, A., Pan, Y., Pruett, S., and Skalli, O. (2007) On the use of ratio standard curves to  
717 accurately quantitate relative changes in protein levels by western blot. *Anal Biochem* **361**:  
718 305-307.
- 719 Ruiz, N., Chng, S.S., Hinikera, A., Kahne, D., and Silhavy, T.J. (2010) Nonconsecutive  
720 disulphide bond formation in an essential integral outer membrane protein. *Proc Natl Acad*  
721 *Sci USA* **107**: 12245-12250.
- 722 Ruiz, N., Falcone, B., Kahne, D., and Silhavy, T.J. (2005) Chemical conditionality: a genetic  
723 strategy to probe organelle assembly. *Cell* **121**: 307-317.
- 724 Ruiz, N., Gronenberg, L.S., Kahne, D., and Silhavy, T.J. (2008) Identification of two inner-  
725 membrane proteins required for the transport of lipopolysaccharide to the outer membrane of  
726 *Escherichia coli*. *Proc Natl Acad Sci USA* **105**: 5537-5542.
- 727 Satre, M., and Kennedy, E.P. (1978) Identification of bound pyruvate essential for the activity of  
728 phosphatidylserine decarboxylase of *Escherichia coli*. *J Biol Chem* **253**: 479-483.
- 729 Schulman, H., and Kennedy, E.P. (1977) Relation of turnover of membrane phospholipids to  
730 synthesis of membrane-derived oligosaccharides of *Escherichia coli*. *J Biol Chem* **252**: 4250-  
731 4255.



- 732 Sheetz, M.P., and Singer, S.J. (1974) Biological membranes as bilayer couples. A molecular  
733 mechanism of drug-erythrocyte interactions. *Proc Natl Acad Sci USA* **71**: 4457-4461.
- 734 Silhavy, T.J., Berman, M.L., and Enquist, L.W. (1984) *Experiments with Gene fusions* (Cold  
735 Spring Harbor Laboratory Press, Cold Spring Harbor, New York).
- 736 Sturgis, J.N. (2001) Organisation and evolution of the *tol-pal* gene cluster. *J Mol Microbiol*  
737 *Biotechnol* **3**: 113-122.
- 738 Thong, S., Ercan, B., Torta, F., Fong, Z.Y., Wong, H.Y., Wenk, M.R., *et al.* (2016) Defining key  
739 roles for auxillary proteins in an ABC transporter that maintains bacterial outer membrane  
740 lipid asymmetry. *eLife* **5**: e19042.
- 741 Thormann, K.M., and Paulick, A. (2010) Tuning the flagellar motor. *Microbiology* **156**: 1275-  
742 1283.
- 743 Vines, E.D., Marolda, C.L., Balachandran, A., and Valvano, M.A. (2005) Defective O-antigen  
744 polymerization in *tolA* and *pal* mutants of *Escherichia coli* in response to extracytoplasmic  
745 stress. *J Bacteriol* **187**: 3359-3368.
- 746 Walburger, A., Lazdunski, C., and Corda, Y. (2002) The Tol/Pal system function requires an  
747 interaction between the C-terminal domain of TolA and the N-terminal domain of TolB. *Mol*  
748 *Microbiol* **44**: 695-708.
- 749 Witty, M., Sanz, C., Shah, A., Grossmann, J.G., Mizuguchi, K., Perham, R.N., *et al.* (2002)  
750 Structure of the periplasmic domain of *Pseudomonas aeruginosa* TolA: evidence for an  
751 evolutionary relationship with the TonB transporter protein. *EMBO J* **21**: 4207-4218.
- 752 Wu, T., Melinverni, J., Ruiz, N., Kim, S., Silhavy, T.J., and Kahne, D. (2005) Identification of a  
753 multicomponent complex required for outer membrane biogenesis in *Escherichia coli*. *Cell*  
754 **121**: 235-245.

- 755 Wu, T., McCandlish, A.C., Gronenberg, L.S., Chng, S.S., Silhavy, T.J., and Kahne, D. (2006)  
756 Identification of a protein complex that assembles lipopolysaccharide in the outer membrane  
757 of *Escherichia coli*. *Proc Natl Acad Sci USA* **103**: 11754-11759.
- 758 Yeh, Y.C., Comolli, L.R., Downing, K.H., Shapiro, L., and McAdams, H.H. (2010) The  
759 *Caulobacter* Tol-Pal complex is essential for outer membrane integrity and the positioning of  
760 a polar localization factor. *J Bacteriol* **192**: 4847-4858.
- 761 Yem, D.W., and Wu, H.C. (1978) Physiological characterization of an *Escherichia coli* mutant  
762 altered in the structure of murein lipoprotein. *J Bacteriol* **133**: 1419-1426.
- 763 Yokoto, K., and Kito, M. (1982) Transfer of the phosphatidyl moiety of phosphatidylglycerol to  
764 phosphatidylethanolamine in *Escherichia coli*. *J Bacteriol* **151**: 952-961.
- 765 Zhou, Z., Lin, S., Cotter, R.J., and Raetz, C.R.H. (1999) Lipid A modifications characteristic of  
766 *Salmonella typhimurium* are induced by  $\text{NH}_4\text{VO}_3$  in *Escherichia coli* K-12. *J Biol Chem* **274**:  
767 18503-18514.
- 768

769 **Figure legends**

770

771 **Fig. 1.** Cells lacking the Tol-Pal complex accumulate PLs in the outer leaflet of the OM as  
772 judged by lipid A acylation.

773 Thin layer chromatographic (TLC) analysis of [<sup>32</sup>P]-labelled lipid A extracted from WT, *Δtol-*  
774 *pal*, and various mutant strains (*see text*). Where indicated, WT and *tol-pal* mutants contain an  
775 empty pET23/42 plasmid (p) (Wu *et al.*, 2006) or one expressing the corresponding *tol-pal*  
776 gene(s) at low levels (e.g. *ptol-pal*). As a positive control for lipid A acylation, WT cells were  
777 treated with EDTA (to chelate Mg<sup>2+</sup> and destabilize the LPS layer) prior to extraction. Equal  
778 amounts of radioactivity were spotted for each sample. Lipid spots annotated # represent 1-  
779 pyrophosphoryl-lipid A. Average percentages of lipid A acylation and standard deviations were  
780 quantified from triplicate experiments and plotted below. Student's t-tests: \* *p* < 0.005 as  
781 compared to WT.

782

783 **Fig. 2.** Cells lacking the Tol-Pal complex accumulate excess PLs (relative to LPS) in the OM.

784 A. Steady-state distribution of [<sup>3</sup>H]-glycerol labelled PLs between the IM and the OM of WT,  
785 *Δtol-pal*, and various mutant strains (*upper panel*)(Fig. S4). Distribution of [<sup>3</sup>H]-labelled PLs in  
786 the OMs of respective mutants expressed as fold changes relative to the WT OM (*lower panel*).  
787 The IMs and OMs from both WT and *tol-pal* mutants were separated with equal efficiencies  
788 during sucrose density gradient fractionation (Fig. S3).

789 B. Steady-state PL:LPS ratios in the OMs of WT, *Δtol-pal*, and various mutant strains (*upper*  
790 *panel*). Lipids were labelled with [<sup>14</sup>C]-acetate and differentially extracted from OMs (Fig. S5).  
791 OM PL:LPS ratios of respective mutants expressed as fold changes relative to that in the WT  
792 OM (*lower panel*). Error bars represent standard deviations calculated from triplicate

793 experiments. Student's t-tests: \*  $p < 0.05$ ; \*\*  $p < 0.005$ ; NS, not significant (as compared to  
794 WT).

795

796 **Fig. 3.** Cells lacking the Tol-Pal complex are defective in OM PG/CL turnover.

797 A. A schematic diagram depicting bidirectional movement of PLs across the cell envelope, and  
798 the conversion of PG/CL to PE, via PS, in the IM. How PG may be converted to PS is not  
799 known, though one possible route may involve combining two PG molecules to give CL, and  
800 subsequent hydrolysis of CL to PG and PA (Audet, *et al.*, 1975), a precursor to all PLs  
801 (including PS) in cells. For clarity, other PG turnover pathways are also not shown.

802 B-E. TLC time-course analyses of [<sup>32</sup>P]-pulse-labelled PLs extracted from the IMs and OMs of  
803 (B) WT, (C) WT (with CCCP added), (D)  $\Delta tolA$ , and (E) *tolA*-complemented strains also  
804 harboring the *psd2* mutation. The average percentage levels of PE, PG/CL, and PS in the IM and  
805 OM at each time point, together with standard deviations, were quantified from triplicate  
806 experiments and shown on the right.

807 F. The percentage levels of PG/CL in the IMs and OMs from (B-E) normalized to the  
808 corresponding levels at the start of the chase (0 min).

809

810 **Fig. 4.** Tol-Pal function is required for efficient retrograde PG/CL transport, as judged by OM  
811 PG/CL turnover rates.

812 Single time-point (2-h chase) quantification of the turnover rate of [<sup>32</sup>P]-labelled PG/CL in the  
813 IMs and OMs of (A) WT, *tol-pal* and various mutant strains, and (B)  $\Delta tolA$  overexpressing  
814 OmpC-Mla components, all in the *psd2* background (*see text*) (Fig. S9). Percentage PG/CL  
815 turnover at 2-h is expressed as  $[(\%PG/CL)_{start} - (\%PG/CL)_{2h}]/[(\%PG/CL)_{start}]$ . Average

816 percentage lipid levels and standard deviations were quantified from triplicate experiments.

817 Student's t-tests: \*  $p < 0.0005$  as compared to WT; \*\*  $p < 0.0005$  as compared to  $\Delta tolA$ .

818

819 **Figures**

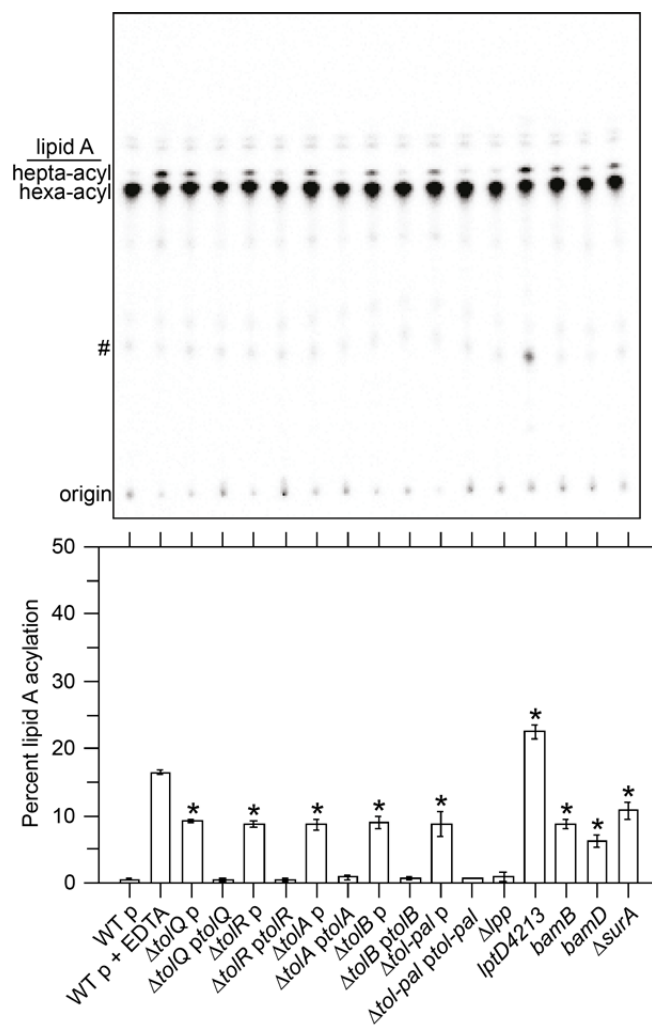

820

821 **Fig. 1**

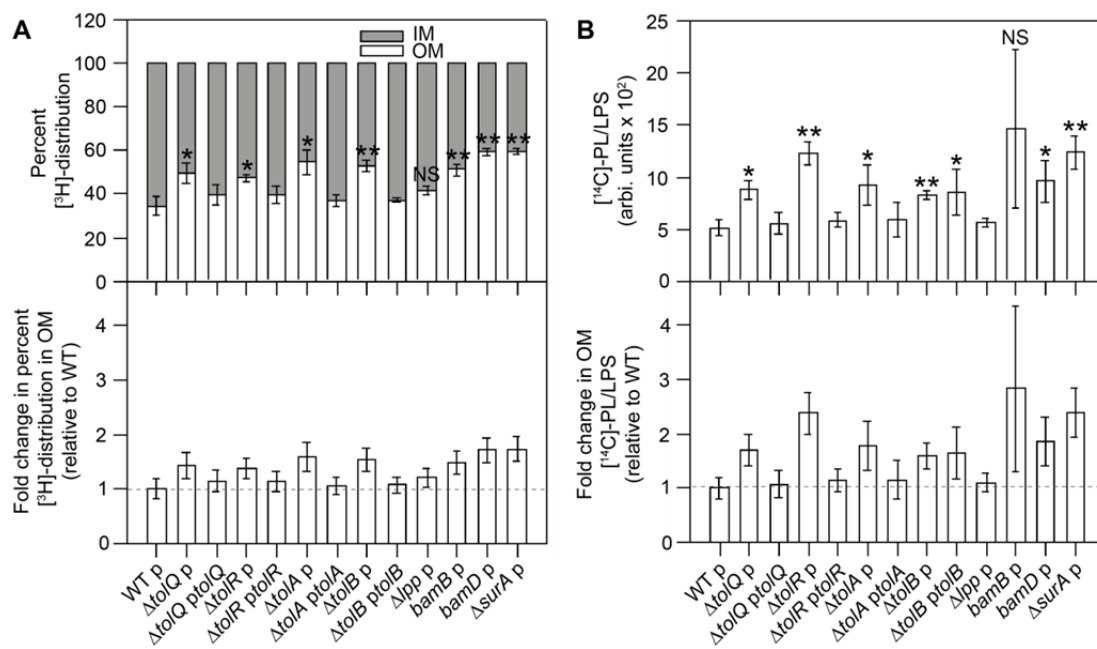

822

823 **Fig. 2**

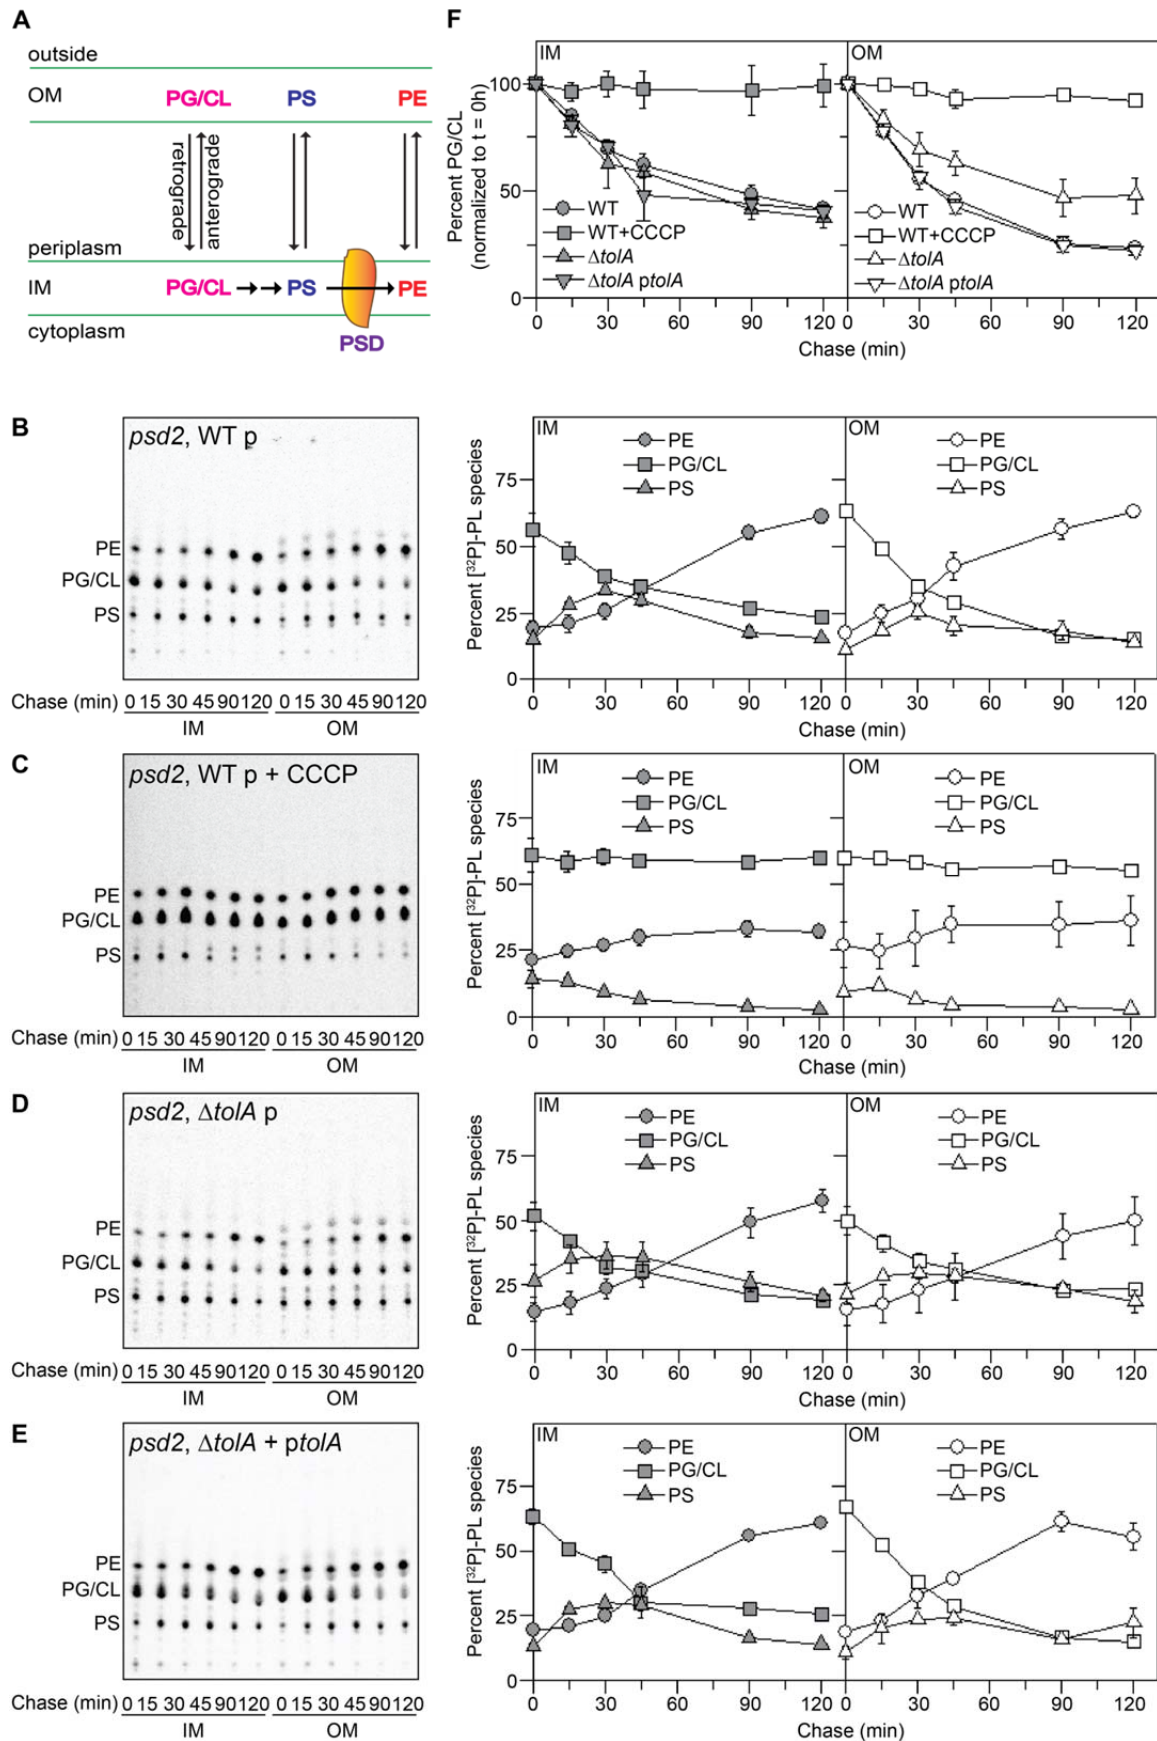



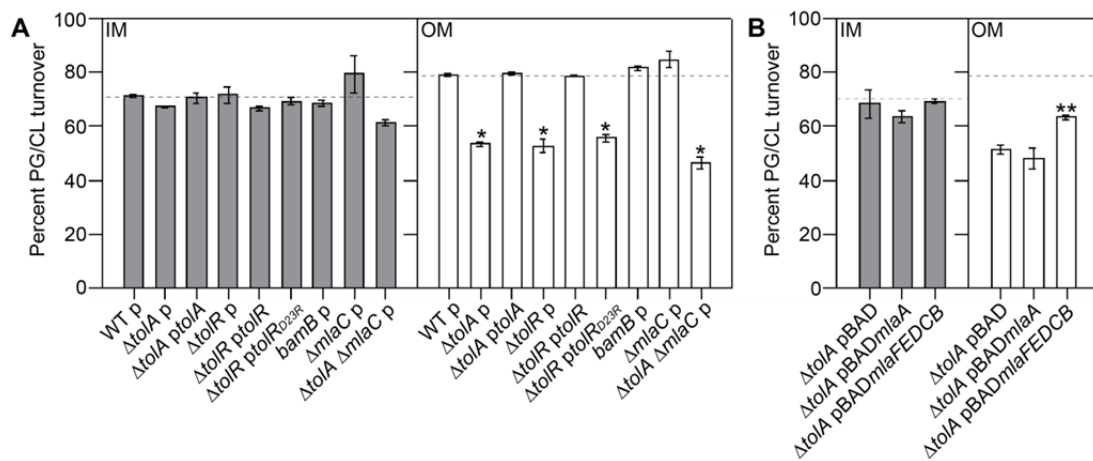

825

826 **Fig. 4**
